# Supplementary material
Source: PubMed Central journal article supplement (PMC4047474)
Supplement: supp_M113.031203_mcp.M113.031203-2.pdf [file supp_M113.031203_mcp.M113.031203-2.pdf]

Table S1. Contents of mappingout.txt

| Column | Name                       | Comment                                                         |
|--------|----------------------------|-----------------------------------------------------------------|
| 1      | Peptide sequence           |                                                                 |
| 2      | Peptide numbering          | Ordered by peptide's genomic coordinates                        |
| 3      | Peptide length             |                                                                 |
| 4      | Gene symbol                | HGNC symbol                                                     |
| 5      | Protein accession          |                                                                 |
| 6      | PSM count                  |                                                                 |
| 7      | Peptide relative intensity | Mean of PSMs relative intensity for this peptide.               |
| 8      | Standard deviation         | Standard deviation of PSMs relative intensity for this peptide. |
| 9      | Cluster                    | Formed by peptide level quantitative analysis                   |
| 10     | Detected clusters NO.      | The number of clusters formed for this gene                     |
| 11     | Variants NO.               | Number of splice variants of this gene in EVDB/ECgene Database  |
| 12     | NOMV                       | Number of variants the peptide mapped to                        |
| 13     | Accession id of variants   | Accession id of known variants the peptide mapped to            |
| 14     | Chromosome                 |                                                                 |
| 15     | Chr_start                  | Genomic start coordinates of this peptide                       |
| 16     | Chr_end                    | Genomic end coordinates of this peptide                         |
| 17     | Trans_start                | Transcriptional start position of this peptide                  |
| 18     | Trans_end                  | Transcriptional end position of this peptide                    |
| 19     | Strand                     | “+” or “-“                                                      |
| 20     | Exon1                      | The exon which the first amino acid of this peptide mapped to   |
| 21     | Exon2                      | The exon which the last amino acid of this peptide mapped to    |

Note: column 9,10 will be 0 if PQQQ is not used. For novel splice junction peptides, Trans\_start and Trans\_end will be length of coding sequence for this peptide localized on the exon1 and exon2.

Table S2. Contents of genestatistic.txt

| Column | Name                      | Description                                         |
|--------|---------------------------|-----------------------------------------------------|
| 1      | Gene symbol               |                                                     |
| 2      | Identified clusters NO.   | Number of clusters formed in peptide level analysis |
| 3      | Known splice variants NO. |                                                     |
| 4      | PSM count                 | Number of PSMs                                      |
| 5      | Unique peptide            | Number of unique peptides identified for this gene  |
| 6      | Identified variants       | Number of identified splice variants                |
| 7      | Variants ID               | Accession number of identified splice variants      |

Note: column 2 will be 0 if PQQQ is not used. Column 6 and 7 will only report splice variants identified from genes that have two or more known splice variants.

Table S3. Comparison of splice variant and SVSPs identification between public domain dataset (4Skin iPS cells mixed with hESCs and fibroblast cells) and our A431 cell line dataset

|                                          | P_Mix1 | P_Mix2 | A_whole | A_heavy | A_medium | A_light |
|------------------------------------------|--------|--------|---------|---------|----------|---------|
| Genes input to SpliceVista               | 5441   | 5543   | 6945    | 7260    | 7244     | 5900    |
| Unique peptides input to SpliceVist      | 27374  | 28948  | 32969   | 36077   | 36417    | 28726   |
| Average sequence coverage                | 14.80% | 15.24% | 14.24%  | 14.06%  | 14.78%   | 14.87%  |
| splice variant identified by SpliceVista | 390    | 397    | 607     | 672     | 681      | 512     |
| Splice variant specific peptides         | 1287   | 1392   | 1680    | 1963    | 2027     | 1309    |

Note: public domain dataset starts with prefix: P; A431 cell line dataset starts with prefix :A

| iTRAQ      | 113 | 114 | 115 | 116 | 117 | 118 | 119 | 121 |
|------------|-----|-----|-----|-----|-----|-----|-----|-----|
|            | 0h  | 0h  | 2h  | 2h  | 6h  | 6h  | 24h | 24h |
| Whole cell | X   | X   | X   | X   | X   | X   | X   | X   |
| Light      | X   | X   | X   | X   | X   | X   | X   | X   |
| Medium     | X   | X   | X   | X   | X   | X   | X   | X   |
| Heavy      | X   | X   | X   | X   | X   | X   | X   | X   |

**Fig.S1.** Experimental setup for A431 cell line time course data. A431 human cells were cultured in Dulbecco's Modified Eagle Medium supplemented with 10% Fetal Bovine Serum, 1% Penicillin/Streptomycin, non-essential amino acids, and sodium pyruvate, all from Invitrogen. Twenty-four hours after seeding, A431 cell line cultures (in duplicates) were treated with Gefitinib and harvested at 2h, 6h and 24h after treatment by trypsination and washed in PBS. Controls were left untreated (duplicates at 0h). Protein samples were further extracted from three subcellular fractions (light, medium, heavy) and whole cell and then digested by trypsin. Trypsin digested peptides from the four different time points and cellular fractions were labeled by 8-plex iTRAQ. The following is subcellular fractionation procedures. For whole cell protein extraction, cells were lysed using buffer A (10mM HEPES pH 7.5, 10mM KCl, 1.5mM MgCl<sub>2</sub>, HALT protease/phosphatase inhibitors, from Pierce/Thermo Scientific) supplemented with 2% SDS. After vortexing, samples were heated to 95°C for 5min and sonicated with a probe sonicator (Bandelin Sonopuls, Buch and Holm) using 2 x 15s, 50% duty cycle, 50% power. For subcellular fractionation cells were re-suspended in buffer A and incubated on ice for 20min. Cells were then disrupted by 30 strokes with a Kontes douncer (2ml, pestle B small clearance 0.0005-0.0025 inch, Kimbel Chase/Sigma-Aldrich). After centrifugation at 600 g (5min, 4°C), the pellet (Heavy fraction, corresponding roughly to plasma membrane and nuclear fraction) was washed once in buffer A, and proteins from the pellet were extracted by the method used for whole cell extraction. The supernatant was centrifuged for pelleting of cytoplasmic organelles (Medium fraction, 100,000 g, 1h, 4°C). The supernatant from the ultra-centrifugation was supplemented with 1% SDS and saved as the soluble fraction (Light fraction). Proteins from the pellet were extracted by the method used for whole cell extraction. A431 protein extracts from whole cell and from the three subcellular fractions were processed following a slightly modified FASP protocol. The resulting peptide mixtures were arranged into four sets (whole, light, medium and heavy) and peptides at different time points in each set were labeled with iTRAQ8plex (ABSciex). After pooling, all iTRAQ8-labeled peptide sets were cleaned by strong cation exchange solid phase extraction (SCX-SPE, strata-X-C, Phenomenex), and aliquoted for IEF.

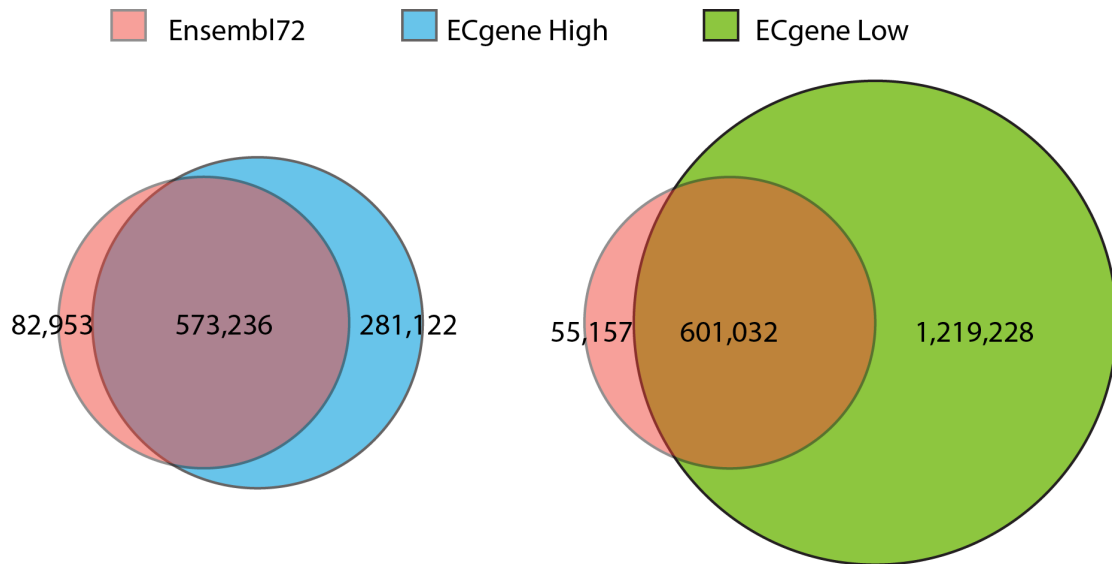

**Fig.S2.** Overlap of tryptic digested peptides (6aa-40aa long) from Ensembl 72 human protein database, and ECgene human splice variant database at high and low evidence level.

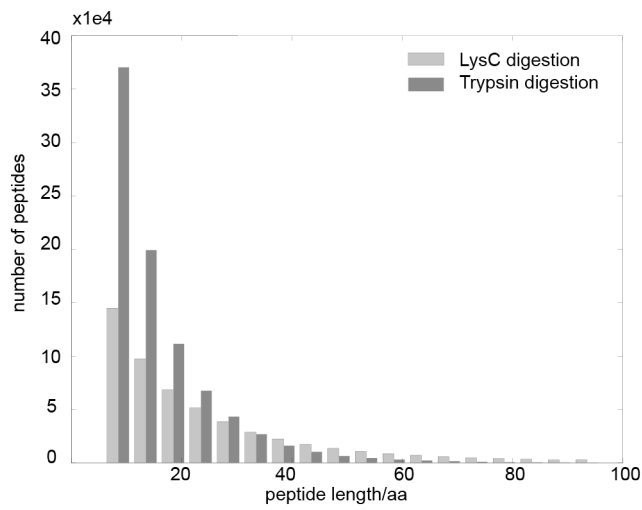

**Fig.S3.** peptide length distribution using LysC or Trypsin digestion. Only peptides  $\geq 6$ aa were counted. By trypsin digestion, 96% peptides are between 6aa and 40 aa long, while by lysC digestion, 82% peptides are between 6aa and 40 aa long.

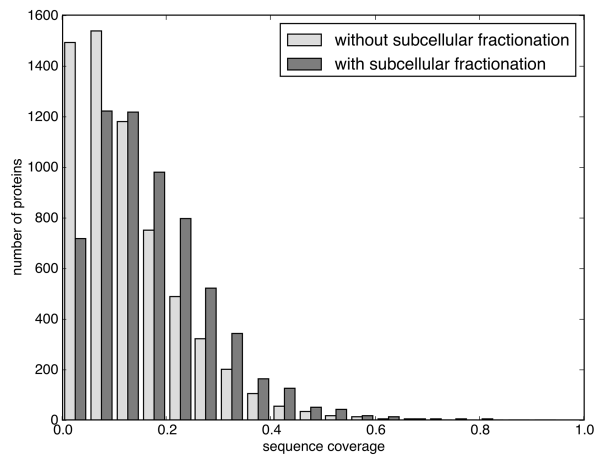

Fig.S4. Distribution of protein sequence coverage for proteins identified with and without subcellular fractionation. 6211 proteins that are both identified with and without subcellular fractionation are included in this plot.

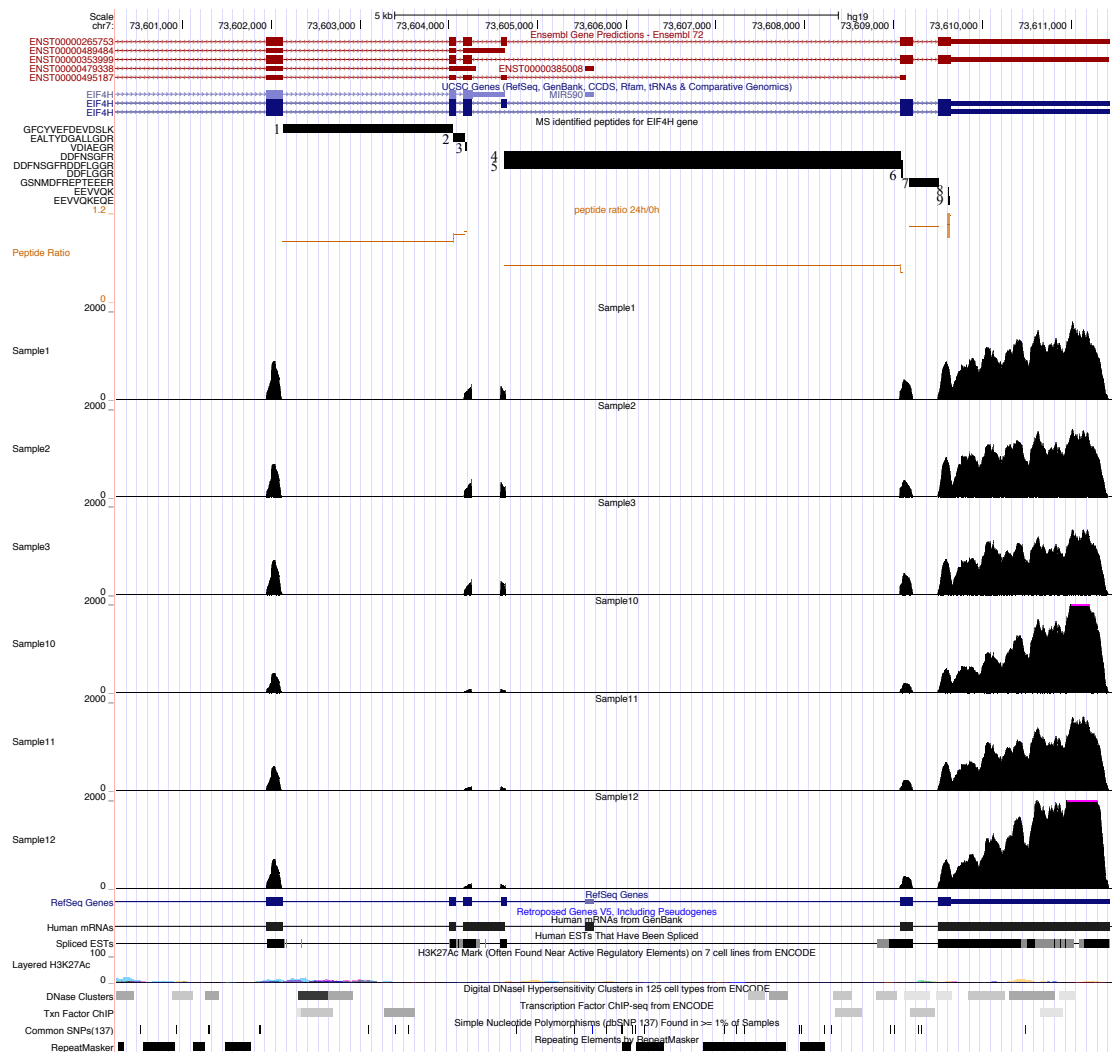

**Fig.S5.** Comparison of the same samples between protein level data (MS based proteomics) and RNA level data (RNA-seq) by UCSC genome browser. Black boxes are peptides, in total nine peptides were identified for EIF4H by MS. The start and end position of a black box indicates the genomic position of the first and last amino acid of this peptide, the box length is not scaled to peptide length. There are five transcripts in the Ensembl gene track (red), two of them (on the first and third row with thicker exon boxes) are protein-coding transcripts. The orange lines indicate the peptide ratio (24h/0h) between time points 24h and 0h after Gefitinib treatment. If two peptides (peptide 4 and 5) overlap in genomic region, the mean of 24h/0h ratio of the two peptides is shown as peptide ratio of that region. Splice variant specific peptide 4 and 5 (uniquely map to ENST00000265753) showed significant down-regulation at 24 h after Gefitinib treatment (see Fig. 7). Sample1, 2 and 3 are read counts from RNA sequencing of biological triplicates of A431 cell line at 0h (no drug treatment); sample10, 11 and 12 are read counts from RNA sequencing of biological triplicates of A431 cell line at 24h after Gefitinib treatment. All samples were plotted in the same scale (read count: 0-2000). The down-regulation of peptide 4, 5 and 6 identified at protein level by MS was also observed at RNA level, shown as a decrease of read count in corresponding genomic region. UCSC custom track files used to generate this figure are pasted in the end of this file.

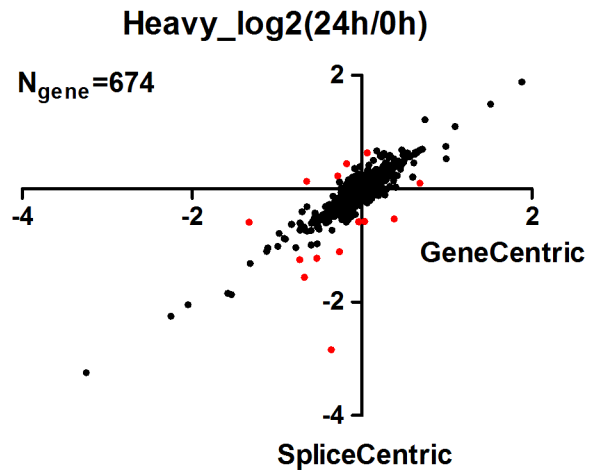

**Fig.S6.** Comparison of 24h/0h log<sub>2</sub> fold change in heavy cell fraction between spliceCentric and geneCentric analysis. 674 genes with SVSPs identified were included. Red dots are genes which showed log<sub>2</sub>(24h/0h) differences between gene centric and splice variant centric analysis larger than 0.5.

**UCSC custom track files used to generate Fig.S3: EIF4H\_bed.txt, EIF4H\_bedgraph.txt.**

EIF4H\_bed.txt

browser position chr7:73602128-73609635

track name=Peptide description="MS identified peptides for EIF4H gene"

|      |          |          |                 |
|------|----------|----------|-----------------|
| chr7 | 73609609 | 73609626 | EEVVQK          |
| chr7 | 73609079 | 73609099 | DDFLGGR         |
| chr7 | 73604621 | 73609078 | DDFNSGFR        |
| chr7 | 73609175 | 73609506 | GSNMDFREPTEEER  |
| chr7 | 73602128 | 73604043 | GFCYVEFDEVDSLK  |
| chr7 | 73604044 | 73604166 | EALTYDGALLGDR   |
| chr7 | 73609609 | 73609635 | EEVVQKEQE       |
| chr7 | 73604176 | 73604196 | VDIAEGR         |
| chr7 | 73604621 | 73609099 | DDFNSGFRDDFLGGR |

EIF4H\_bedgraph.txt

browser position chr7:73602128-73609635

browser full altGraph

track type=bedGraph name="Peptide Ratio" description="peptide ratio 24h/0h" visibility=full color=200,100,0 altColor=0,100,200 priority=20

|      |          |          |        |
|------|----------|----------|--------|
| chr7 | 73609609 | 73609626 | 0.9125 |
| chr7 | 73609079 | 73609099 | 0.4063 |
| chr7 | 73604621 | 73609078 | 0.4845 |
| chr7 | 73609175 | 73609506 | 1.008  |
| chr7 | 73602128 | 73604043 | 0.8105 |
| chr7 | 73604044 | 73604166 | 0.9045 |
| chr7 | 73609609 | 73609635 | 1.1695 |
| chr7 | 73604176 | 73604196 | 0.9535 |
